# Supplementary material for: Improving the care for people with acute low-back pain by allied health professionals (the ALIGN trial): A cluster randomised trial protocol
Source: Implement Sci. 2010 Nov 10;5:86. doi: 10.1186/1748-5908-5-86 (PMC2994785; doi:10.1186/1748-5908-5-86)
Supplement: Additional file 1 — ALIGN intervention content. This file includes an outline of the symposium day, including a brief description of the content in each session. [file 1748-5908-5-86-S1.PDF]

## ALIGN CRT Intervention Content

The intervention for the ALIGN CRT consisted of a full-day weekend symposium-style event (with program and written material supporting presentations/content covered). The first half of the symposium focused on awareness raising and address the following theoretical domains: beliefs about professional role, social influences, beliefs about consequences and knowledge. The second half of symposium included more small group/interactive activity to address beliefs about capabilities and to allow for skill development regarding both target behaviours.

A summary of the content delivered in each session of the symposium is outline below.

| Time    | Content                                                                                                                                                                                                                                                                                                                                                                                                                                                          |
|---------|------------------------------------------------------------------------------------------------------------------------------------------------------------------------------------------------------------------------------------------------------------------------------------------------------------------------------------------------------------------------------------------------------------------------------------------------------------------|
| 9:00am  | <i>Welcome and introductions (by study investigator)</i>                                                                                                                                                                                                                                                                                                                                                                                                         |
| 9:20am  | <i>Audience straw poll #1 (lead by study investigator)</i><br>Using audience response system software, 10 questions measuring knowledge, attitudes, beliefs and intentions about acute low-back pain management were posed to the audience, who could respond anonymously using wireless keypads, and aggregated results of participants were presented in real time                                                                                             |
| 9:35am  | <i>Keynote speech by peer opinion leader</i><br>Speech given by high status person recognised within the profession to discuss professional standards, state-of-the-art in diagnosis and/or communicating with patients with acute low-back pain, including use of latest research evidence and clinical practice guidelines                                                                                                                                     |
| 10:20am | <i>Video recording by peer opinion leader</i><br>Pre-recorded video of well respected clinician conveying confidence in diagnosis without plain x-ray, dispelling fears around missed pathology and/or litigation, and conveying importance of reassuring patients                                                                                                                                                                                               |
| 10:30am | <i>Video recording by radiologist</i><br>Pre-recorded video of radiologist outlining the amount of radiation delivered by plain x-ray and its poor utility in acute uncomplicated low-back pain                                                                                                                                                                                                                                                                  |
| 10:35am | <i>Video recording by consumer advocate</i><br>Pre-recorded video or consumer advocate describing their expectation of a good health professional (those who are good listeners/ communicators, provide good explanations/ reassurance, and provide evidence-informed best care)                                                                                                                                                                                 |
| 10:40am | Morning tea                                                                                                                                                                                                                                                                                                                                                                                                                                                      |
| 11:00am | <i>Small group discussion</i><br>Discussion between six participants lead by a clinician table facilitator , to discuss how the participants currently manage people with acute low-back pain, what participants think of the guideline and its recommendations, any scenarios participants find managing patients in a manner consistent with the guideline (i.e., less plain x-rays, giving advice to stay active) difficult, and strategies to overcome these |
| 12:00pm | <i>Skills demonstration (managing acute LBP patients without x-ray)</i><br>Demonstration / modelling of skills needed to diagnose and manage patients without plain x-ray by an experienced clinician                                                                                                                                                                                                                                                            |
| 12:15pm | <i>Skills demonstration (advising acute LBP patients to stay active)</i><br>Demonstration / modelling of relevant skills in a successful communication encounter (giving advice to stay active) with patient (e.g. strategies on how to                                                                                                                                                                                                                          |

|         |                                                                                                                                                                                                                                                                                                                                                                                                       |
|---------|-------------------------------------------------------------------------------------------------------------------------------------------------------------------------------------------------------------------------------------------------------------------------------------------------------------------------------------------------------------------------------------------------------|
|         | develop rapport, convey empathy, confidence, reassure patient, give message that patient will improve over time etc) by experienced clinician                                                                                                                                                                                                                                                         |
| 12:40pm | Lunch                                                                                                                                                                                                                                                                                                                                                                                                 |
| 1:45pm  | <i>Small group practical: Simulated patients</i><br>Rehearsal of diagnostic and communication skills on trained simulated patients (x4) in groups of six participants, lead by a clinician table facilitator                                                                                                                                                                                          |
| 3:00pm  | Afternoon tea                                                                                                                                                                                                                                                                                                                                                                                         |
| 3:15pm  | <i>Reflection lead by peer opinion leader</i><br>Brief summary/reflection of the key messages presented throughout the day, with opportunity for questions from the audience                                                                                                                                                                                                                          |
| 3:45pm  | <i>Audience straw poll #2 (lead by study investigator)</i><br>Using audience response system software, 3 questions measuring beliefs about the extent to which participants believe their management of acute low-back pain patients will change were posed to the audience, who could respond anonymously using wireless keypads, and aggregated results of participants were presented in real time |
| 4:00pm  | <i>Summary and evaluation</i>                                                                                                                                                                                                                                                                                                                                                                         |
| 4:30pm  | Close                                                                                                                                                                                                                                                                                                                                                                                                 |

Two-four weeks following the symposium, participants received a follow-up telephone call by a clinician member of project team to enquire about any difficulties encountered in implementing behaviours (and strategies to overcome these) and to discuss how practice has changed (academic detailing style).
